# Supplementary material for: Activating Connexin43 gap junctions primes adipose tissue for therapeutic intervention
Source: PubMed Central journal article supplement — Acta Pharm Sin B. 2022 Feb 26;12(7):3063–72. doi: 10.1016/j.apsb.2022.02.020 (PMC9293664; doi:10.1016/j.apsb.2022.02.020), 2022-02-26
Supplement: mmc1.pdf [file mmc1.pdf]

---

Supporting Information for

Original article

## Activating Connexin43 gap junctions primes adipose tissue for therapeutic intervention

Yi Zhu<sup>a,g,\*</sup>, Na Li<sup>a</sup>, Mingyang Huang<sup>g</sup>, Xi Chen<sup>g</sup>, Yu A. An<sup>a</sup>, Jianping Li<sup>b</sup>, Shangang Zhao<sup>a</sup>, Jan-Bernd Funcke<sup>a</sup>, Jianhong Cao<sup>c</sup>, Zhenyan He<sup>c</sup>, Qingzhang Zhu<sup>a</sup>, Zhuzhen Zhang<sup>a</sup>, Zhao V. Wang<sup>b</sup>, Lin Xu<sup>d,e</sup>, Kevin Williams<sup>b</sup>, Chien Li<sup>f</sup>, Kevin Grove<sup>f</sup>, Philipp E. Scherer<sup>a,h,\*</sup>

<sup>a</sup>*Touchstone Diabetes Center, Department of Internal Medicine, the University of Texas Southwestern Medical Center at Dallas, Dallas, TX 75390, USA*

<sup>b</sup>*Division of Cardiology, Department of Internal Medicine, the University of Texas Southwestern Medical Center at Dallas, Dallas, TX 75390, USA*

<sup>c</sup>*Division of Hypothalamic Research, Department of Internal Medicine, the University of Texas Southwestern Medical Center at Dallas, Dallas, TX 75390, USA*

<sup>d</sup>*Quantitative Biomedical Research Center, Department of Population and Data Sciences, the University of Texas Southwestern Medical Center at Dallas, Dallas, TX 75390, USA*

<sup>e</sup>*Department of Pediatrics, the University of Texas Southwestern Medical Center at Dallas, Dallas, TX 75390, USA*

<sup>f</sup>*Novo Nordisk Research Center, Seattle, WA 98109, USA*

<sup>g</sup>*Children's Nutrition Research Center, Department of Pediatrics, Baylor College of Medicine, Houston, TX 77030, USA*

<sup>h</sup>*Department of Cell Biology, the University of Texas Southwestern Medical Center at Dallas, Dallas, TX 75390, USA*

Received 30 October 2021; received in revised form 16 January 2022; accepted 8 February 2022

\*Correspondence authors. Tel.: +1 214 6488715.

E-mail addresses: Philipp.Scherer@UTSouthwestern.edu (Philipp E. Scherer), Yi.Zhu@bcm.edu (Yi Zhu).

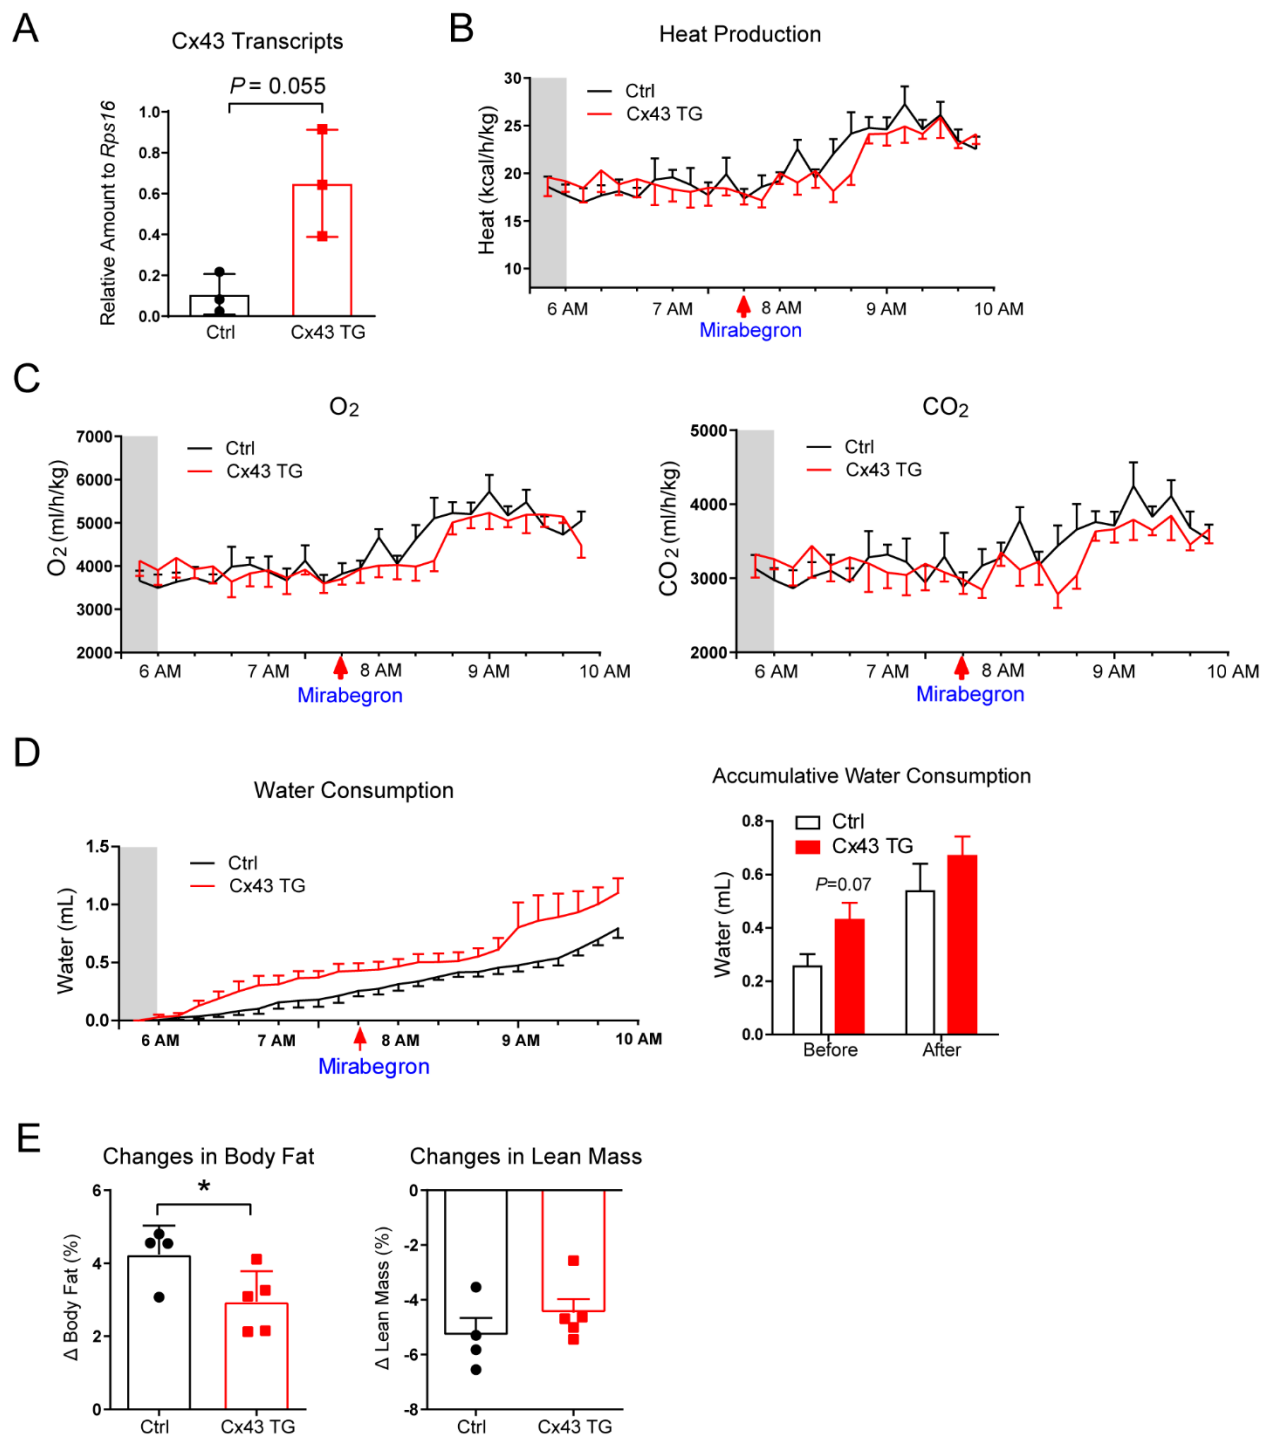

**Figure S1** Other metabolic parameters in control and Cx43 TG mice treated with Mirabegron. **(A)** Cx43 expression in iWAT from 12-week-old control (Ctrl) and Cx43 TG mice after overnight Dox10 chow diet treatment. **(B)** Heat production (normalized to body weight) during the metabolic cage experiment shown in Fig. 1D and 1E ( $n = 4-5$  mice). **(C)** O<sub>2</sub> consumption and CO<sub>2</sub> emission rate (normalized to body weight) during the metabolic cage experiment in Fig. 1D and 1E ( $n = 4-$

5 mice). The shaded area indicates the dark cycle. **(D)** Left: Water consumption during the experiment in Fig. 1C and 1D. Right: accumulative water consumption before and after mirabegron treatment ( $n = 4-5$  mice). **(E)**. Changes in body fat (normalized to body weight, expressed as a percentage), and lean mass (normalized to body weight, expressed as a percentage) after metabolic cage experiment shown in Fig. 1D and 1E ( $n = 4-5$  mice). All data are mean  $\pm$  SEM.  $*P < 0.05$ .

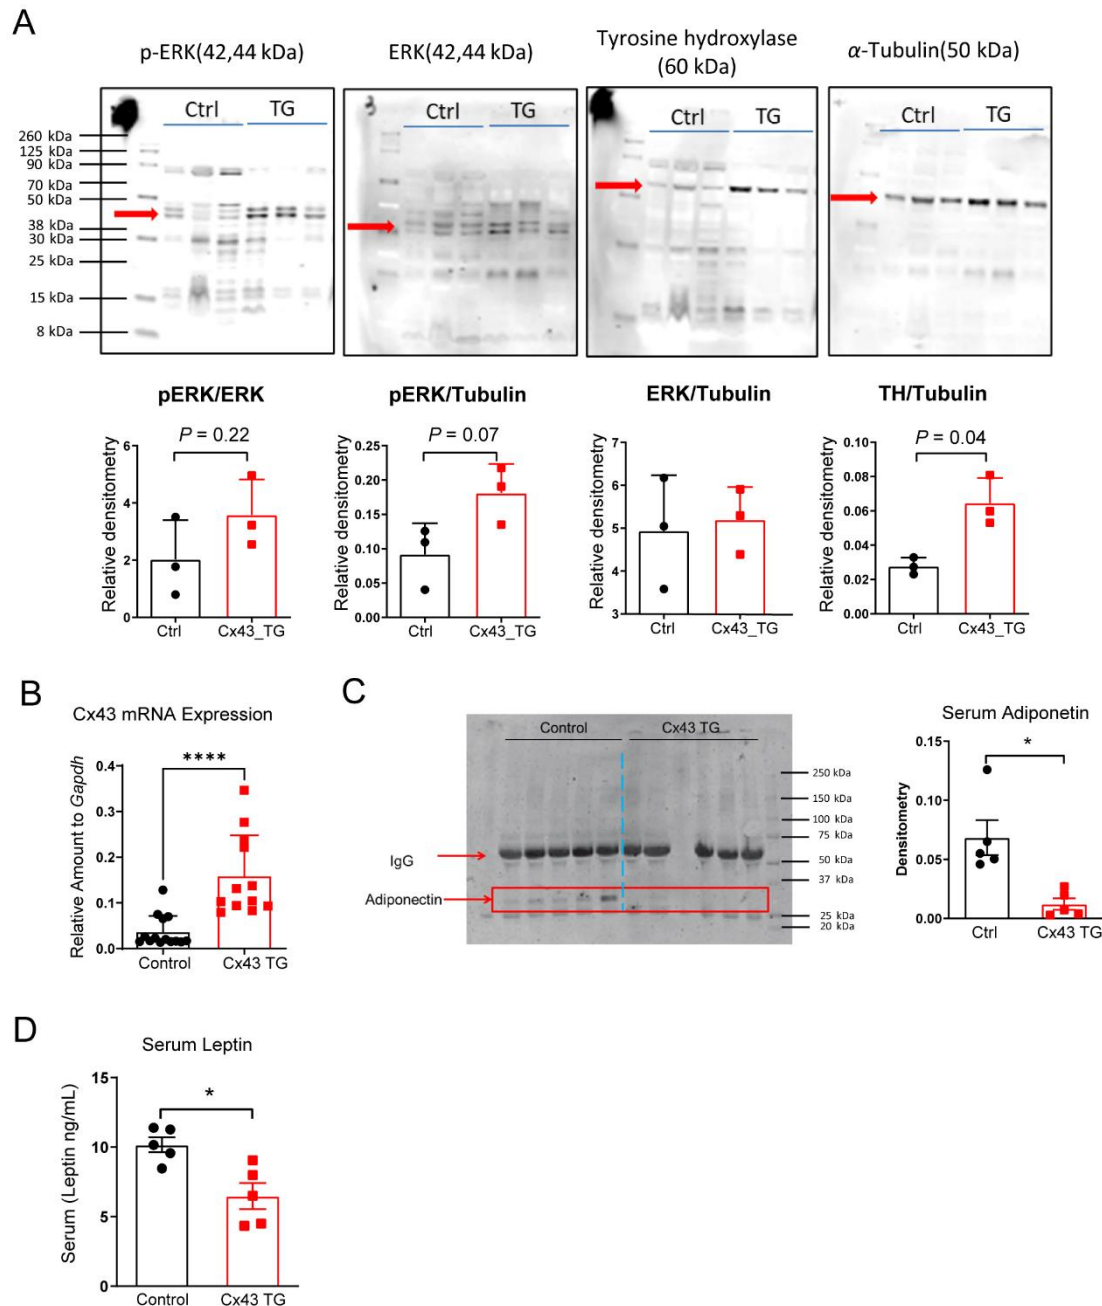

**Figure S2** Biochemical analysis of control and Cx43 TG mice. **(A)** Western blotting for p-ERK, ERK, tyrosine hydroxylase (TH), and  $\alpha$ -tubulin in brown adipose tissue lysates generated from control and Cx43 TG mice fed with HFD supplemented with 200 mg/kg doxycycline for 4 weeks. The protein ladder (LI-COR Chameleon Duo 928-60000) shows two different patterns in respective channels. Control samples are labeled as “Ctrl”, Cx43 TG samples are labeled as “TG”. Analysis of densitometry is shown below blots ( $n = 3$  mice). **(B)** Cx43 mRNA levels from iWAT harvested from Cx43 TG mice used in Fig. 2B, which were kept on 50 mg/kg doxycycline HFD

for 10 days ( $n = 12\text{--}14$  mice). (C) Western blotting for serum adiponectin levels from control and Cx43 TG mice fed with HFD supplemented with 200 mg/kg doxycycline for 4 weeks. Quantification of serum adiponectin abundance (normalized to mouse serum IgG) is shown on the right. Protein ladder (LI-COR Odyssey Protein Molecular Weight Marker 928–60000). ( $n = 5$  mice). (D). Serum leptin levels from control and Cx43 TG mice fed with HFD supplemented with 200 mg/kg doxycycline for 4 weeks ( $n = 6$  mice). All data are mean  $\pm$  SEM; \* $P < 0.05$ , \*\*\*\* $P < 0.0001$ .

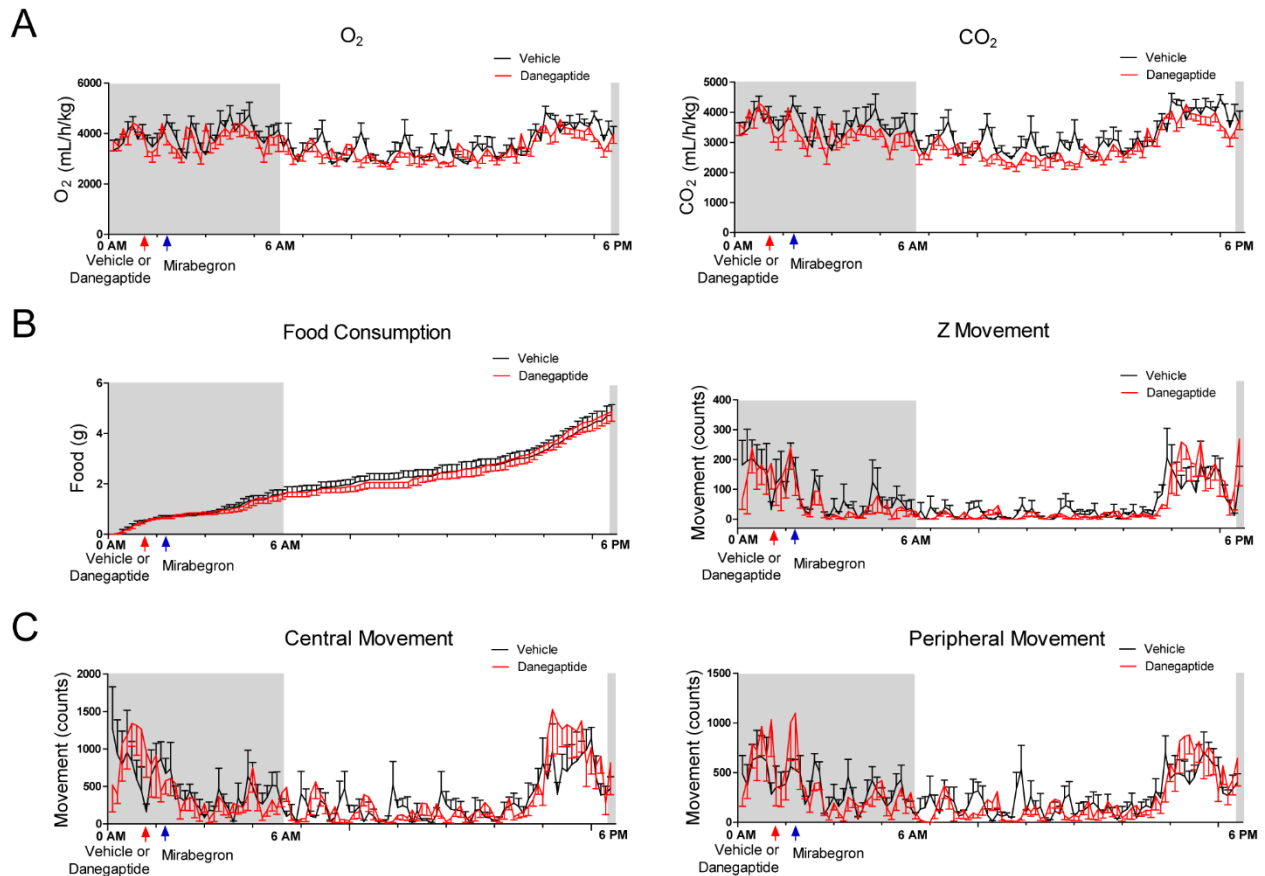

**Figure S3** Metabolic characterization of mice treated with danegaptide and mirabegron. (A) O<sub>2</sub> consumption and CO<sub>2</sub> emission rate (normalized to body weight) were measured in the metabolic cage experiment shown in Fig. 3B ( $n = 6$  mice). (B) Accumulative food consumption and food-seeking activity (Z movement) were measured in the metabolic cage experiment shown in Fig. 3B ( $n = 6$  mice). (C) Central and peripheral activities were measured in the metabolic cage experiment shown in Fig. 3B ( $n = 6$  mice). The shaded area indicates the dark cycle. All data are mean  $\pm$  SEM.

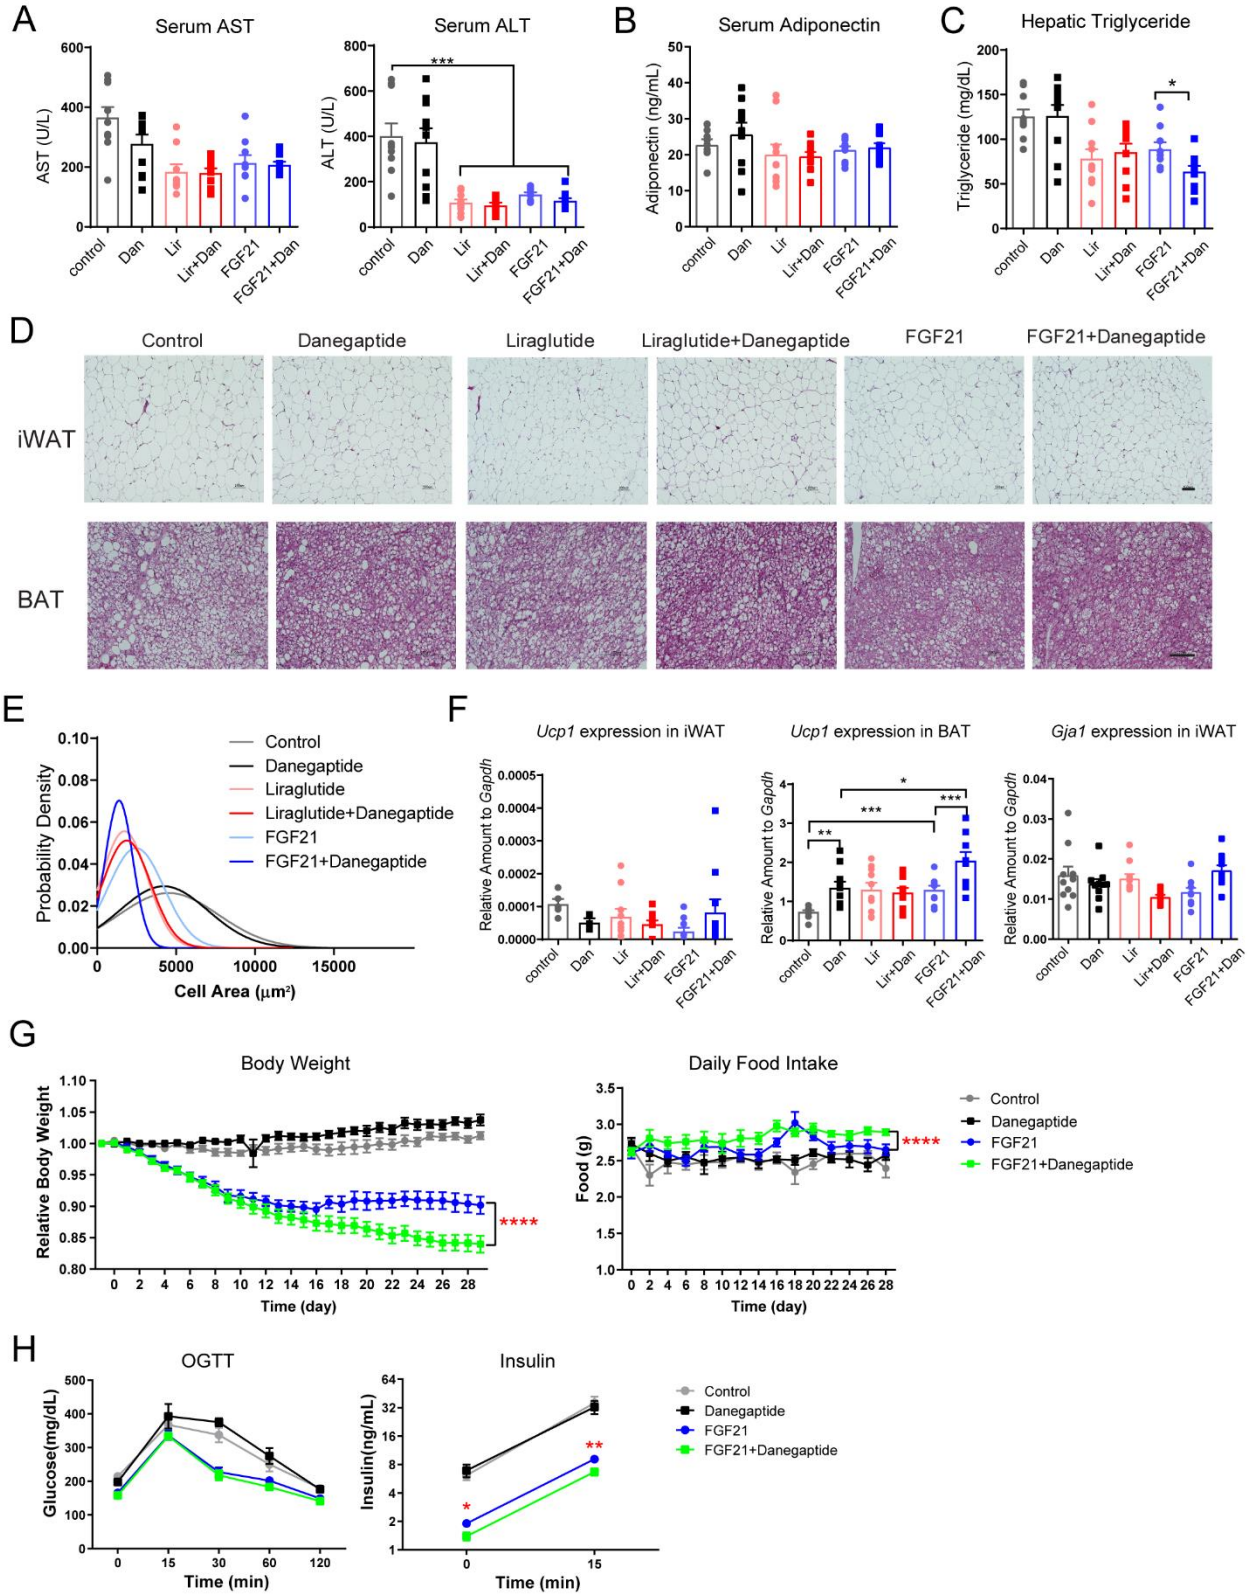

**Figure S4** Further improvement of metabolic function when combing FGF21 with danegaptide. The treatment condition for Panels A–E is illustrated in Fig. 4A. The treatment condition for Panels

G and H was similar except that mice were treated with drugs for 29 days. **(A)** Serum AST and ALT levels after treatment ( $n = 9-10$  mice). **(B)** Serum adiponectin levels after treatment ( $n = 9-10$  mice). **(C)** Hepatic triglyceride content after the treatment ( $n = 9-10$  mice). **(D)** Representative histology of the iWAT and BAT from at least three mice. Scale bar = 100  $\mu\text{m}$ . **(E)** Summary of iWAT adipocytes area distribution in each treatment condition. **(F)** *Ucp1* expression in iWAT and BAT. *Cx43* expression in iWAT ( $n = 10$  mice). **(G)** Weight-loss and food intake during 4 weeks of FGF21 (1 mg/kg body weight) and danegaptide (10 mg/kg body weight) combinatory treatment ( $n = 6-10$  mice). **(H)** Oral glucose tolerance (OGTT) (left) and insulin levels (right) after 4 weeks FGF21 (1 mg/kg body weight) and danegaptide (10 mg/kg body weight) treatment ( $n = 6-9$  mice). All data are mean  $\pm$  SEM; \* $P < 0.05$ , \*\* $P < 0.01$ , \*\*\* $P < 0.001$ , \*\*\*\* $P < 0.0001$ .
